# Supplementary material for: Distribution of bromine in mixed iodide–bromide organolead perovskites and its impact on photovoltaic performance
Source: Royal Society of Chemistry journal article supplement (doi:10.1039/c6ta07647e), 2016-01-01
Supplement: c6ta07647e1.pdf [file c6ta07647e1.pdf]

## Supporting information

### Distribution of bromine in mixed iodide-bromide organolead perovskites and its impact on photovoltaic performance

Yang Zhou, Feng Wang, Honghua Fang, Maria Antonietta Loi, Fangyan Xie, Ni Zhao\* and Ching-Ping Wong\*

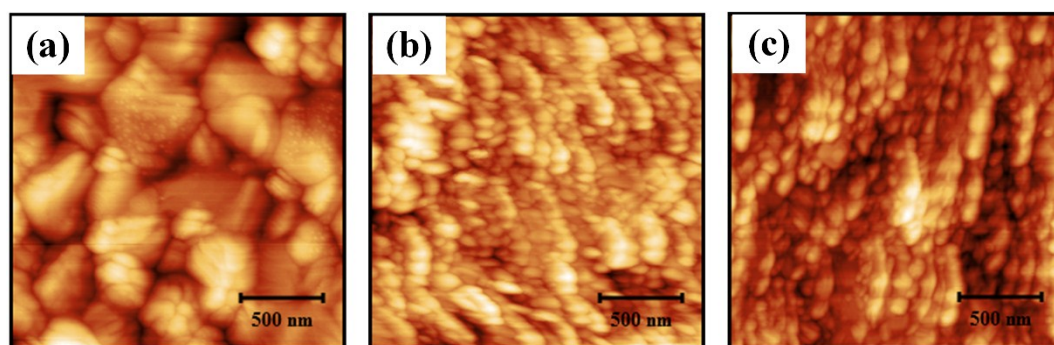

Figure S1. AFM images of MAPb(I<sub>1-x</sub>Br<sub>x</sub>)<sub>3</sub> films: (a) x=0, (b) x=0.03 and (c) x=0.11.

Table S1. The  $R_{ms}$  values of MAPb(I<sub>1-x</sub>Br<sub>x</sub>)<sub>3</sub> films with x=0, 0.03 and 0.11 derived from the raw data of AFM images.

| x             | 0    | 0.03 | 0.12 |
|---------------|------|------|------|
| $R_{ms}$ (nm) | 7.72 | 6.71 | 4.59 |

The grain size of the MAPb(I<sub>1-x</sub>Br<sub>x</sub>)<sub>3</sub> perovskite films is estimated from the full width at half maximum (FWHM) of the XRD peak (2Theta around 30°) according to Scherrer equation  $B(2\theta) = \frac{K\lambda}{L\cos\theta}$  [1], where B is the sample's FWHM,  $\theta$  is diffraction angle, L is the grain size,  $\lambda$  is the wavelength of Cu  $\alpha$ 1 radiation (1.540562Å) and K is a constant and for spherical crystals with cubic symmetry this value is 0.94[1]. For the proper determination of the FWHM, the FWHM contributed by Cu  $\alpha$ 2 radiation and the setup is removed. The FWHM contributed by the setup is estimated from the XRD peak (2Theta=30.14°) of the MAPbBr<sub>3</sub> single crystal. The estimated grain sizes are around 200nm for MAPb(I<sub>1-x</sub>Br<sub>x</sub>)<sub>3</sub> (x=0, 0.03 and 0.11) and are summarized in Table S2.

Table S2. The estimation of grain sizes of the MAPb(I<sub>1-x</sub>Br<sub>x</sub>)<sub>3</sub> perovskite films with x=0, 0.03, and 0.11.

| x                            | 0     | 0.03  | 0.11  | 1 (single crystal) |
|------------------------------|-------|-------|-------|--------------------|
| Peak position 2 $\theta$ (°) | 28.32 | 28.42 | 28.54 | 30.14              |
| FWHM B (mrad)                | 0.68  | 0.70  | 0.77  | 0.63               |
| Grain size (nm)              | 220   | 215   | 195   | NA                 |

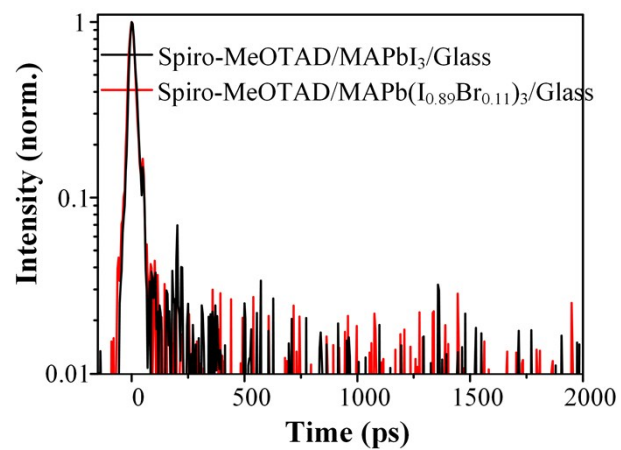

Figure S2. The TRPL decay of HI-aided MAPb(I<sub>1-x</sub>Br<sub>x</sub>)<sub>3</sub> (x=0 and 0.11) perovskite films incorporated in between glass and spiro-MeOTAD.

Table S3. Summary of the solar cell performance for MAPb(I<sub>1-x</sub>Br<sub>x</sub>)<sub>3</sub> perovskite (x=0, 0.03, 0.11, 0.20 and 0.29).

| $x$  | Thickness (nm) | $J_{sc}$ (mA/cm <sup>2</sup> ) | $V_{oc}$ (V) | FF (%)   | PCE (%)  |
|------|----------------|--------------------------------|--------------|----------|----------|
| 0    | 500            | 18.42±0.55                     | 0.88±0.01    | 46.3±3.4 | 7.5±0.8  |
|      | 330            | 21.10±0.30                     | 0.98±0.01    | 68.5±3.3 | 14.2±0.6 |
|      | 240            | 19.60±0.48                     | 0.96±0.01    | 58.9±2.0 | 11.1±0.4 |
| 0.03 | 500            | 18.96±0.38                     | 0.97±0.01    | 60.3±2.2 | 11.2±0.6 |
| 0.11 | 260            | 18.53±0.36                     | 1.02±0.02    | 61.9±0.4 | 11.7±0.8 |
|      | 340            | 20.44±0.20                     | 1.00±0.01    | 59.0±1.8 | 12.1±0.4 |
|      | 460            | 21.55±0.41                     | 1.01±0.02    | 68.2±0.8 | 14.8±0.6 |
|      | 510            | 22.38±0.28                     | 1.01±0.02    | 70.3±1.7 | 15.8±0.6 |
|      | 570            | 20.59±0.59                     | 1.01±0.01    | 61.8±0.3 | 12.8±0.5 |
|      | 660            | 17.99±0.37                     | 1.00±0.01    | 58.0±0.5 | 10.4±0.2 |
| 0.20 | 510            | 19.86±0.35                     | 1.09±0.01    | 63.7±0.2 | 13.8±0.6 |
| 0.29 | 510            | 13.54±0.62                     | 0.92±0.02    | 36.8±0.9 | 4.6±0.3  |

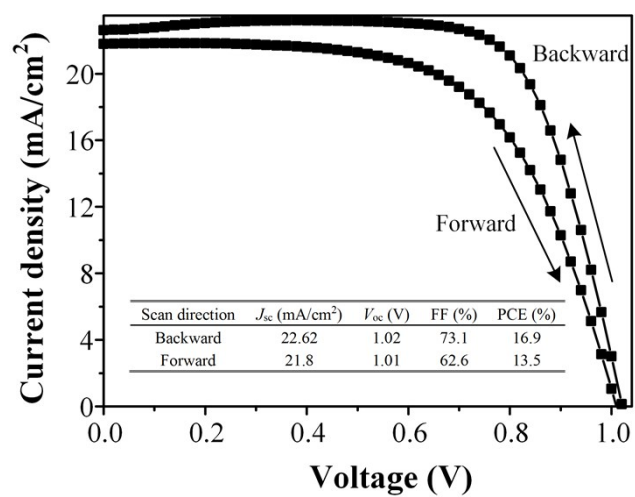

Figure S3. The PV performance of the champion cell prepared from MAPb(I<sub>0.89</sub>Br<sub>0.11</sub>)<sub>3</sub> perovskite.
